# Supplementary material
Source: PubMed Central journal article supplement (PMC3926909)

R

L

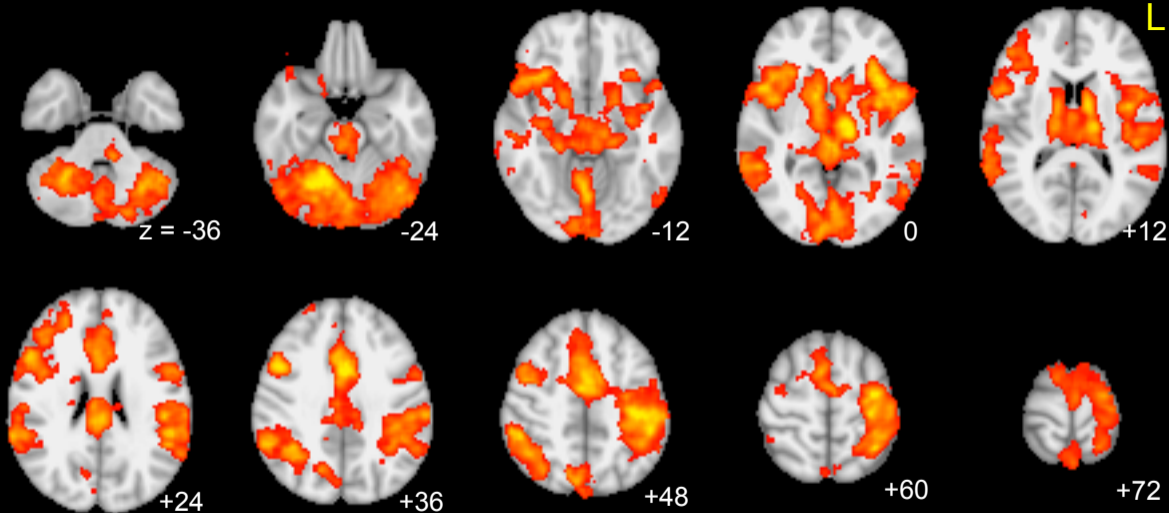

Targets vs. Standards

2.3

z-score

5.0

Supplement: NIHMS520897-supplement-02.pdf [file NIHMS520897-supplement-02.pdf]

R

L

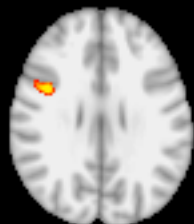

z = +28

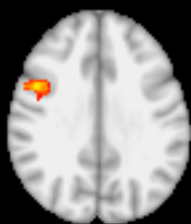

+32

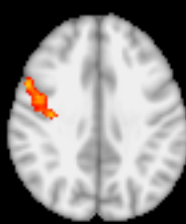

+36

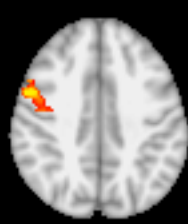

+40

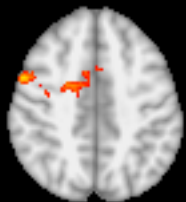

+44

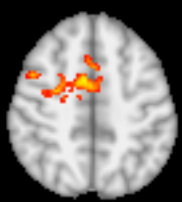

+48

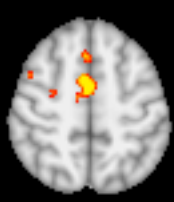

+52

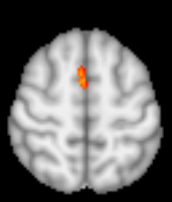

+58

RT Variability

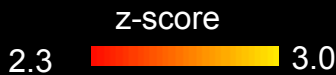

Supplement: NIHMS520897-supplement-03.pdf [file NIHMS520897-supplement-03.pdf]
